# Supplementary material for: On-Tissue Chemical Derivatization for Comprehensive Mapping of Brain Carboxyl and Aldehyde Metabolites by MALDI–MS Imaging
Source: PubMed Central journal article supplement (PMC10161219; doi:10.1021/jasms.2c00336), 2023-04-13
Supplement: js2c00336_si_001.pdf [file js2c00336_si_001.pdf]

## SUPPORTING INFORMATION

# On-Tissue Chemical Derivatization for Comprehensive Mapping of Brain Carboxyl and Aldehyde Metabolites by MALDI-MS Imaging

Ibrahim Kaya<sup>a</sup>, Luke S. Schembri<sup>b</sup>, Anna Nilsson<sup>a</sup>, Reza Shariatgorji<sup>a</sup>, Sooraj Baijnath<sup>a</sup>, Xiaoqun Zhang<sup>c</sup>, Erwan Bezar<sup>d</sup>, Per Svenningsson<sup>c</sup>, Luke R. Odell<sup>b\*</sup> and Per E. Andrén<sup>a\*</sup>

- a) Department of Pharmaceutical Biosciences, Spatial Mass Spectrometry, Science for Life Laboratory, Uppsala University, SE-75123 Uppsala, Sweden
- b) Department of Medicinal Chemistry, Uppsala University, SE-75123 Uppsala, Sweden
- c) Section of Neurology, Department of Clinical Neuroscience, Karolinska Institutet, SE-17177 Stockholm, Sweden.
- d) Université de Bordeaux, Institut des Maladies Neurodégénératives, F-33000 Bordeaux, France

### Corresponding Authors

#### Per E. Andrén

Department of Pharmaceutical Biosciences, Spatial Mass Spectrometry, Science for Life Laboratory, Uppsala University, BMC 591, SE-75124 Uppsala, Sweden

per.andren@farmbio.uu.se; +46-70 167 9334

#### Luke R. Odell

Department of Medicinal Chemistry, Uppsala University, BMC 591, SE-75124 Uppsala, Sweden

luke.odell@ilk.uu.se; +46-18 471 4297

### Content

|                                             |                   |
|---------------------------------------------|-------------------|
| <b>Supporting Information, Figure S1-S9</b> | <b>page 2-10</b>  |
| <b>Supporting Information, Table S1</b>     | <b>page 11-12</b> |
| <b>Supporting Information, References</b>   | <b>page 12</b>    |

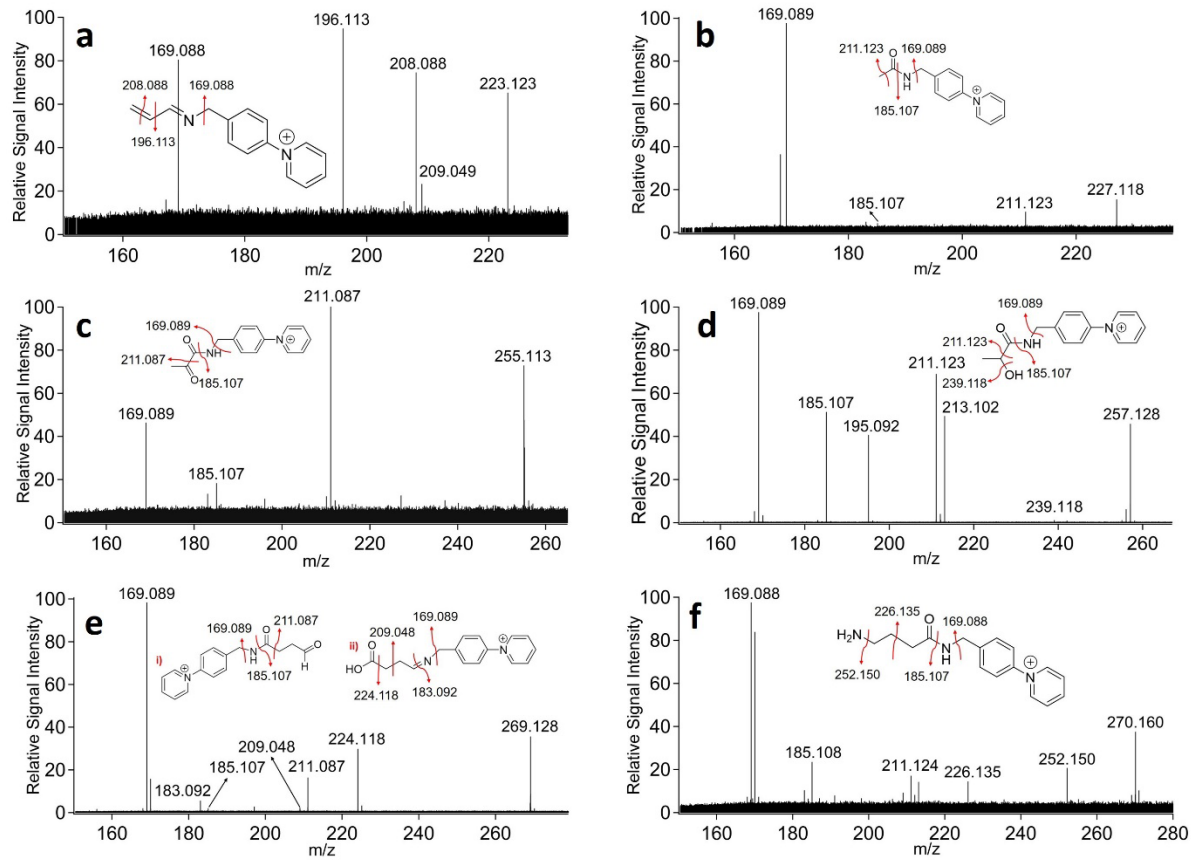

**Supporting Information Figure S1.** MS/MS spectra obtained from rat brain tissue sections using MALDI-CID-FTICR from the precursor ions at (a)  $m/z$  223.123, (b)  $m/z$  227.118, (c)  $m/z$  255.113, (d)  $m/z$  257.128, (e)  $m/z$  269.128, and (f)  $m/z$  270.160. Proposed fragmentation pathways for AMPP-derivatized (a) acrolein, (b) acetic acid, (c) pyruvic acid, (d) lactic acid, (e) succinic semialdehyde, and (f)  $\gamma$ -aminobutyric acid (GABA). Due to the isolation width of 1  $m/z$  unit, additional isobaric and isomeric compounds could also be fragmented, giving rise to additional product ions.

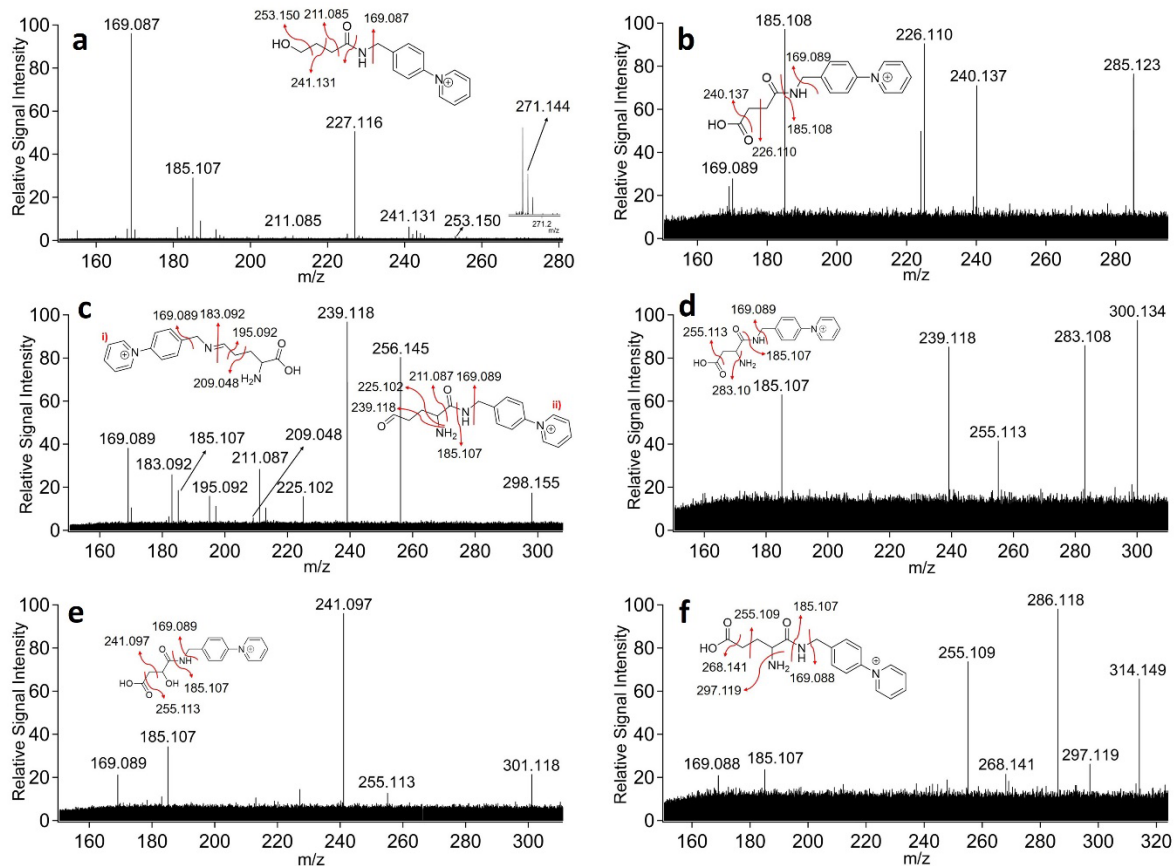

**Supporting Information Figure S2.** MS/MS spectra obtained from rat brain tissue sections using MALDI-CID-FTICR from the precursor ions at (a)  $m/z$  271.144, (b)  $m/z$  285.123, (c)  $m/z$  298.155, (d)  $m/z$  300.134, (e)  $m/z$  301.118, and (f)  $m/z$  314.149. Proposed fragmentation pathways for AMPP-derivatized (a) hydroxybutyric acid-GHB, (b) succinic acid, (c) glutamate semialdehyde, (d) aspartic acid, (e) malic acid, and (f) glutamate. Due to the isolation width of 1  $m/z$  unit, additional isobaric and isomeric compounds could also be fragmented, giving rise to additional product ions.

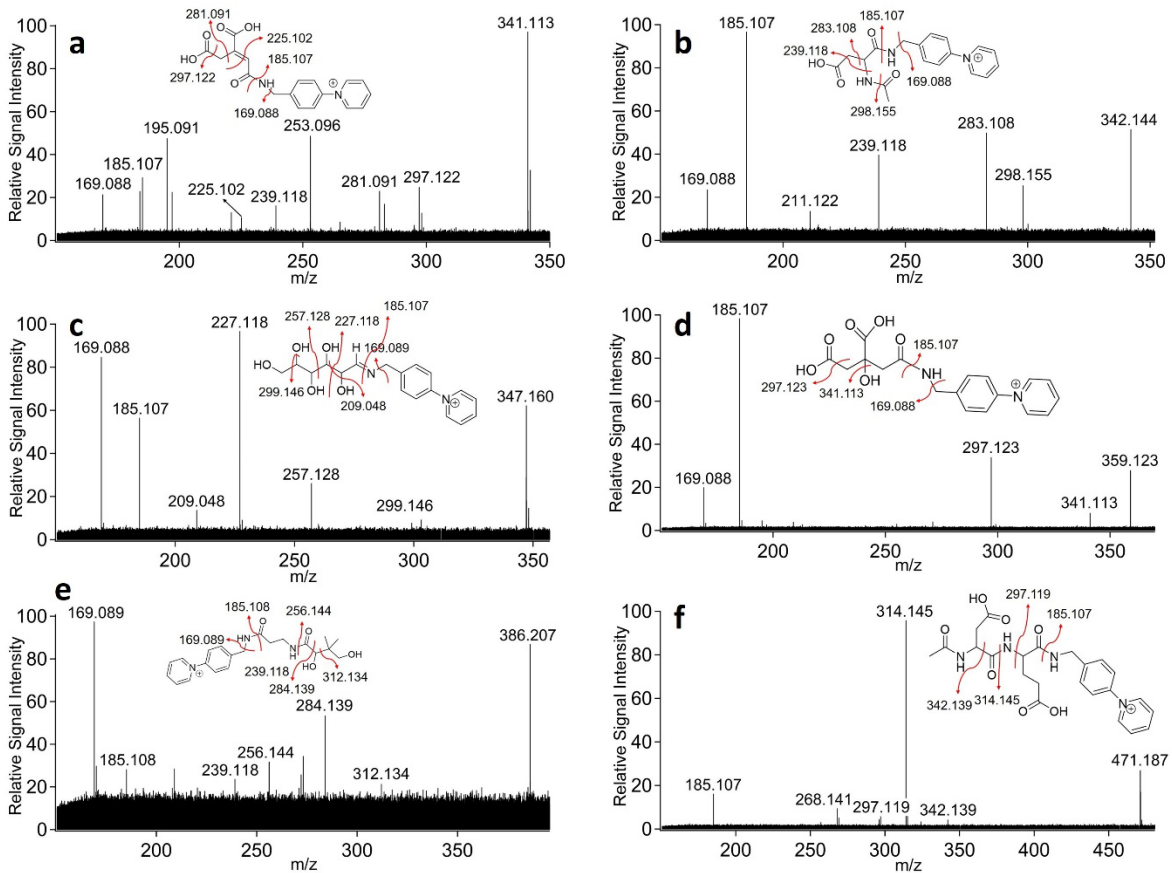

**Supporting Information Figure S3.** MS/MS spectra obtained from rat brain tissue sections using MALDI-CID-FTICR from the precursor ions at (a)  $m/z$  341.113, (b)  $m/z$  342.144, (c)  $m/z$  347.160, (d)  $m/z$  359.123, (e)  $m/z$  386.207, and (f)  $m/z$  471.187. Proposed fragmentation pathways for AMPP-derivatized (a) aconitic acid, (b) N-acetyl aspartic acid, (c) glucose/galactose, (d) citric acid/isocitric acid, (e) pantothenic acid, and (f) N-acetyl aspartyl glutamate (NAAG). Due to the isolation width of 1  $m/z$  unit, additional isobaric and isomeric compounds could also be fragmented, giving rise to additional product ions.

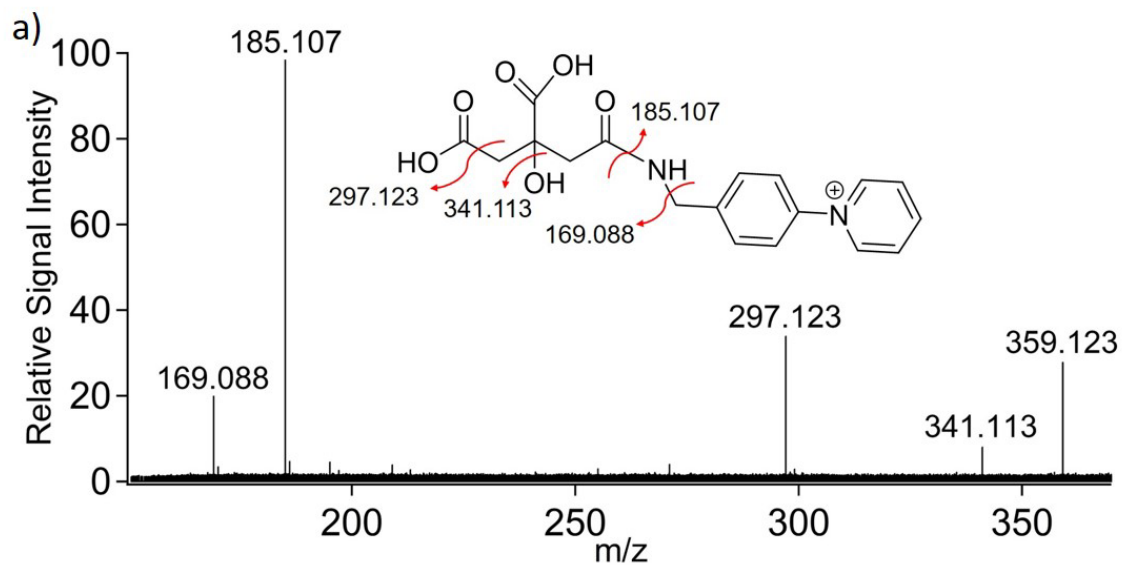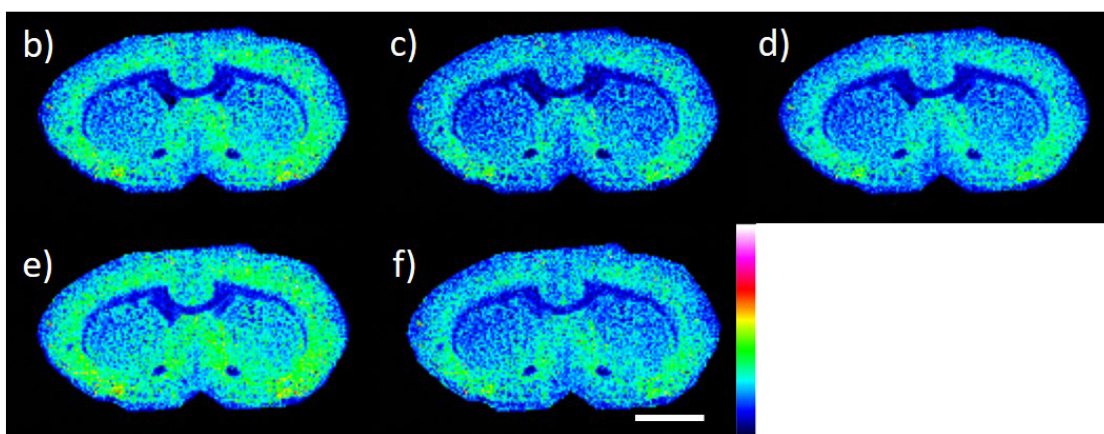

**Supporting Information Figure S4.** (a) MS/MS spectrum showing product ions supporting the assignment of citric acid/isocitric acid obtained from rat brain tissue sections using MALDI-CID-FTICR from the precursor ion at  $m/z$  359.123. MALDI-MS/MS imaging of coronal rat brain tissue sections using MALDI-CID-FTICR reveals the distributions of the precursor and product ions (without normalisation) at (b)  $m/z$  359.123, (c)  $m/z$  341.113, (d)  $m/z$  297.123, (e)  $m/z$  185.107, and (f)  $m/z$  169.088. Due to the isolation width of 1  $m/z$  unit, additional isobaric and isomeric compounds could also be fragmented, giving rise to additional product ions. The scale bar is 3 mm.

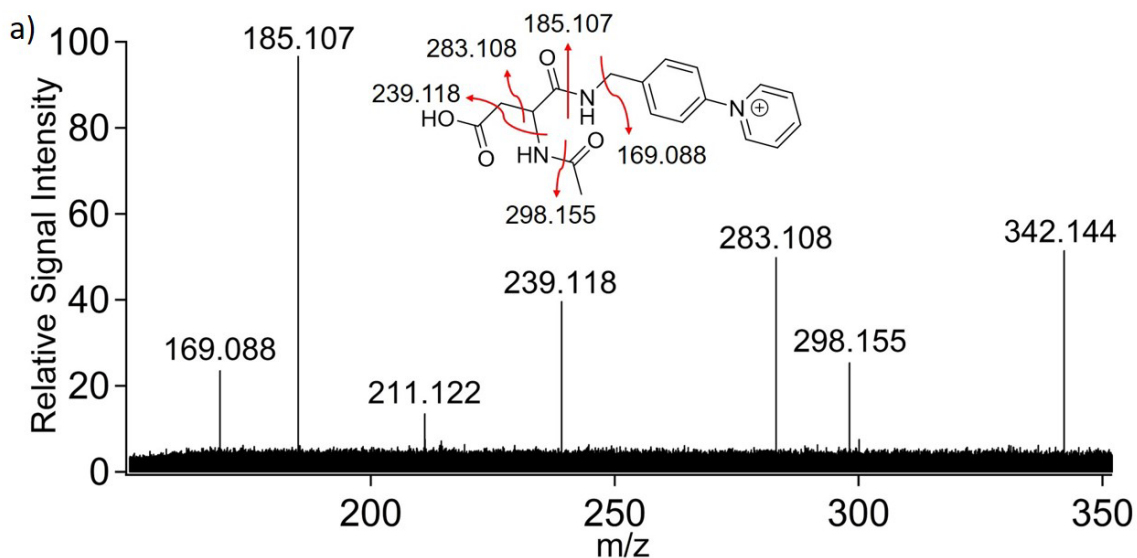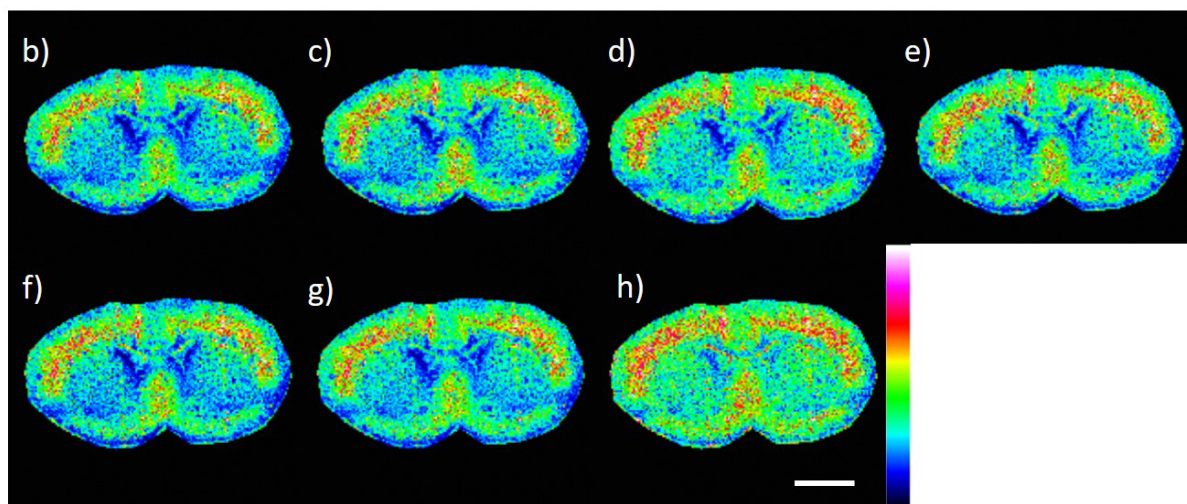

**Supporting Information Figure S5.** (a) MS/MS spectrum showing product ions supporting the assignment of *N*-acetyl aspartic acid obtained from rat brain tissue sections using MALDI-CID-FTICR from the precursor ion at  $m/z$  342.144. MALDI-MS/MS imaging of coronal rat brain tissue sections using MALDI-CID-FTICR reveals the distributions of the precursor and product ions (without normalisation) at (b)  $m/z$  342.144, (c)  $m/z$  298.155, (d)  $m/z$  283.108, (e)  $m/z$  239.118, (f)  $m/z$  211.122, (g)  $m/z$  185.107, and (h)  $m/z$  169.088. Due to the isolation width of 1  $m/z$  unit, additional isobaric and isomeric compounds could also be fragmented, giving rise to additional product ions. The scale bar is 3 mm.

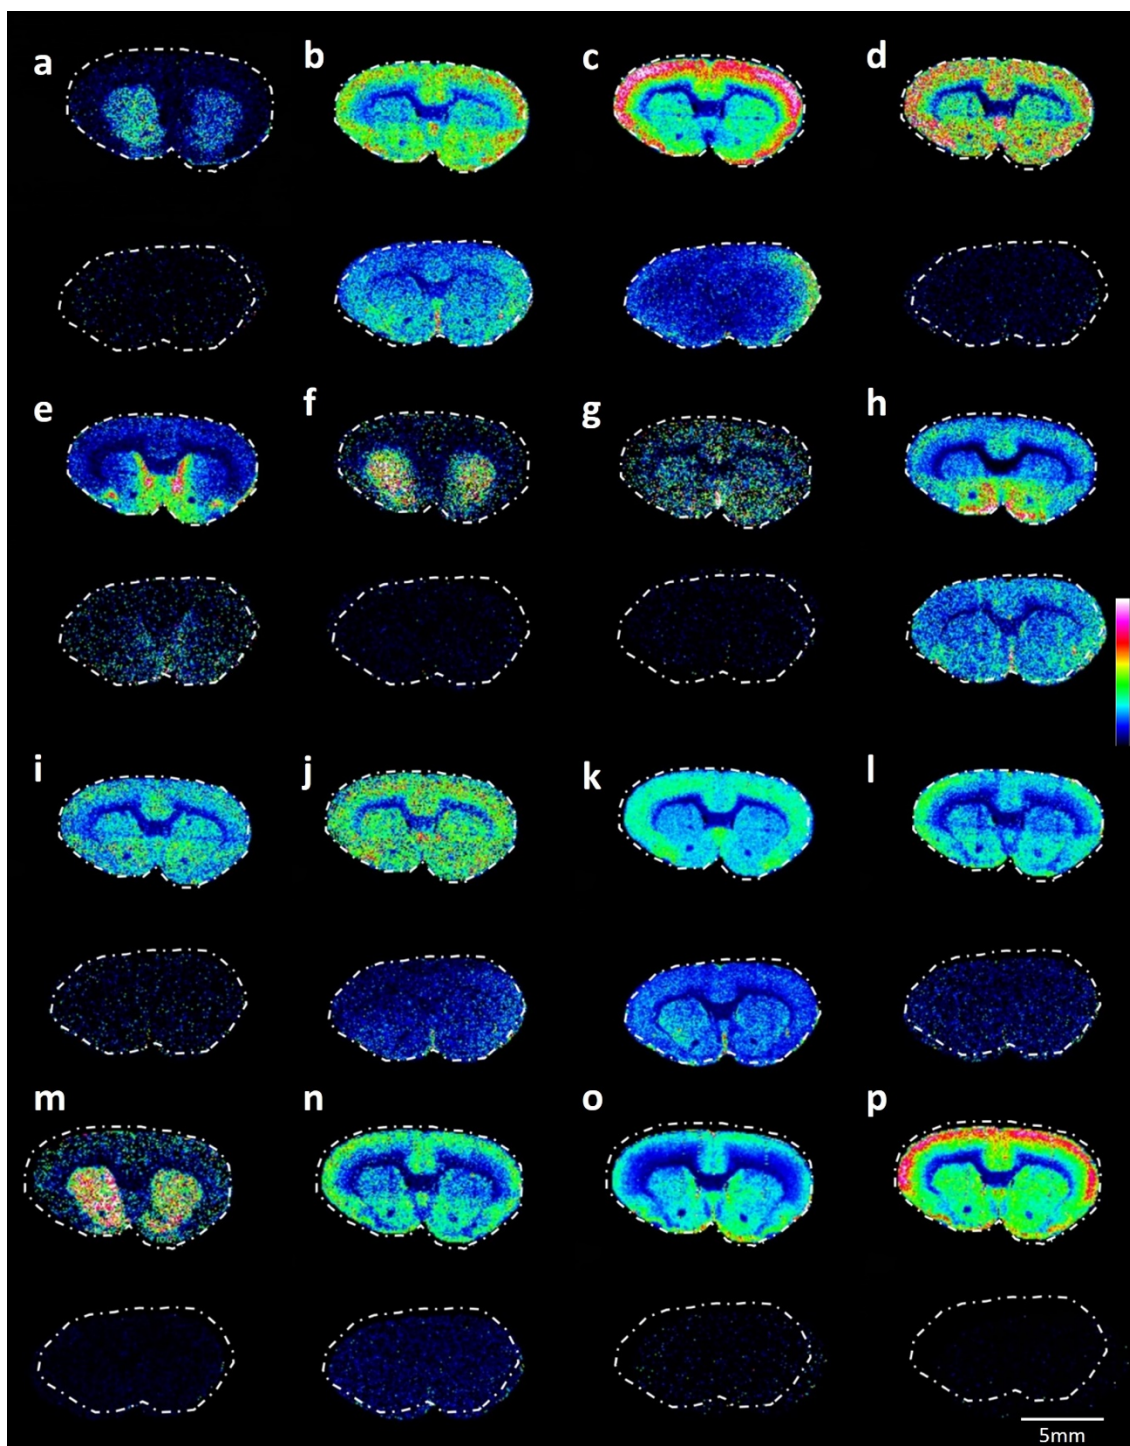

**Supporting Information Figure S6.** Comparative MALDI-MS images of metabolites within 6-OHDA-lesioned rat brain tissue with AMPP/HATU derivatization and a norharmine matrix (upper panel) versus a 9-AA matrix (lower panel). MALDI-MSI ion images of AMPP/HATU derivatized compounds in positive ion mode: (a) DOPAC, (b) aconitic acid, (c) succinic acid, (d) oxaloacetic acid, (e) pantothenic acid, (f) homovanilic acid (HVA), (g) 5-hydroxyindoleacetic acid (HIAA), (h) gamma-aminobutyric acid (GABA), (i) hydroxybutyric acid-GHB, (j)  $\alpha$ -ketoglutaric acid, (k) citric acid/isocitric acid, (l) acetic acid, (m) DOPAL, (n) acrolein, (o) pentadecanal, and (p) heptadecanal. Data are shown using a rainbow scale (ion intensity scale) for optimal visualization. Lateral resolution, 100  $\mu$ m.

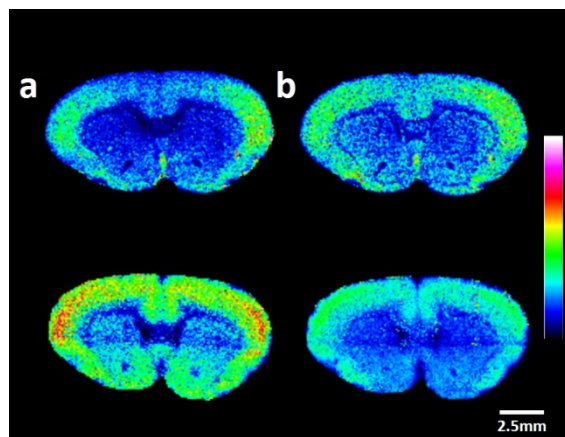

**Supporting Information Figure S7.** Comparative MALDI-MS images of (a) aspartic acid and (b) *N*-acetyl aspartic acid in 6-OHDA-lesioned rat brain tissue sections with a 9-AA matrix (upper panel) versus AMPP/HATU derivatization and a norharmane matrix (lower panel). Data are shown using a rainbow scale (ion intensity scale) for optimal visualization. Lateral resolution, 100  $\mu$ m.



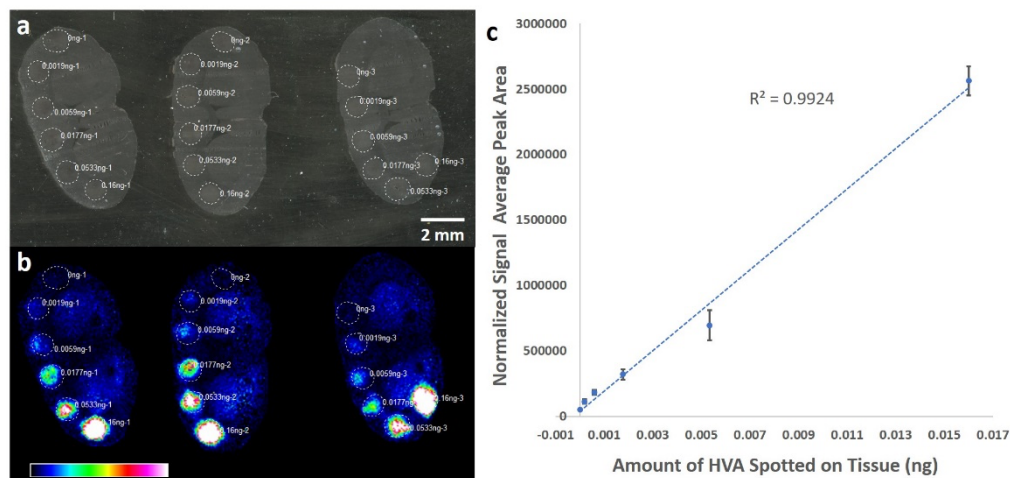

**Supporting Information Figure S8.** Linear calibration curve of HVA within the striatum of coronal rat brain tissue sections. (a) Brightfield images of three consecutive coronal rat brain tissue sections spotted with 0.10  $\mu$ l of a HVA solution with the following concentrations: 0.16, 0.0533, 0.0177, 0.0059, 0.0019, and 0 ng/ $\mu$ l; the solution was spotted on the cortex of three consecutive coronal rat brain tissue sections. (b) MALDI-MS ion images of derivatized endogenous HVA (0-15%) and the spotted HVA solution (representing concentrations of 0-15%). (c) Linear calibration curve (spotted ng of HVA vs normalized signal average peak area) within the detectable range for HVA obtained by normalizing the HVA signals to HVA- $d_5$  signals in rat coronal brain tissue sections. Lateral resolution, 100  $\mu$ m.

**Evaluation of HVA Quantification with AMPP/HATU Derivatization and MALDI-MSI.** We generated a linear calibration curve for HVA in rat coronal brain tissue sections using AMPP/HATU derivatization as follows. We prepared solutions (in 50% EtOH) at various concentrations of HVA, namely, 0.16, 0.0533, 0.0177, 0.0059, 0.0019, and 0 ng/ $\mu$ l, and then spotted 0.10  $\mu$ l of each solution across the cortex of three consecutive coronal rat brain tissue sections (Figure S8a). Next, we sprayed 0.31  $\mu$ g/ml of HVA- $d_5$  on tissue sections under the following conditions: nozzle temperature was set at 90°C, the reagent was sprayed pneumatically (6 psi of N<sub>2</sub>) in six passes at a linear velocity of 110 cm/min with 2 mm track spacing and a flow rate of 80 $\mu$ l/min; AMPP/HATU derivatization and MALDI-MSI were performed as indicated in the methods part. We detected endogenous HVA, as well as the spotted HVA down to a concentration of 0.00019 ng/ $\mu$ l, from the rat brain tissue sections (Figure S8b). We normalized the HVA signals to HVA- $d_5$  signals in SCiLS Lab (v. 2019a Pro, Bruker Daltonics) software and generated a linear calibration curve (Figure S7c) using the average peak area obtained from three consecutive replicates of each solution on three consecutive coronal rat brain tissue sections. Due to the presence of endogenous HVA within the cortex of rat brain tissue sections, we do not claim absolute quantification of the amount of HVA within rat brain tissue sections. However, the good linear response to our concentration range indicates that our method can be used to quantify certain metabolites within brain tissue sections.

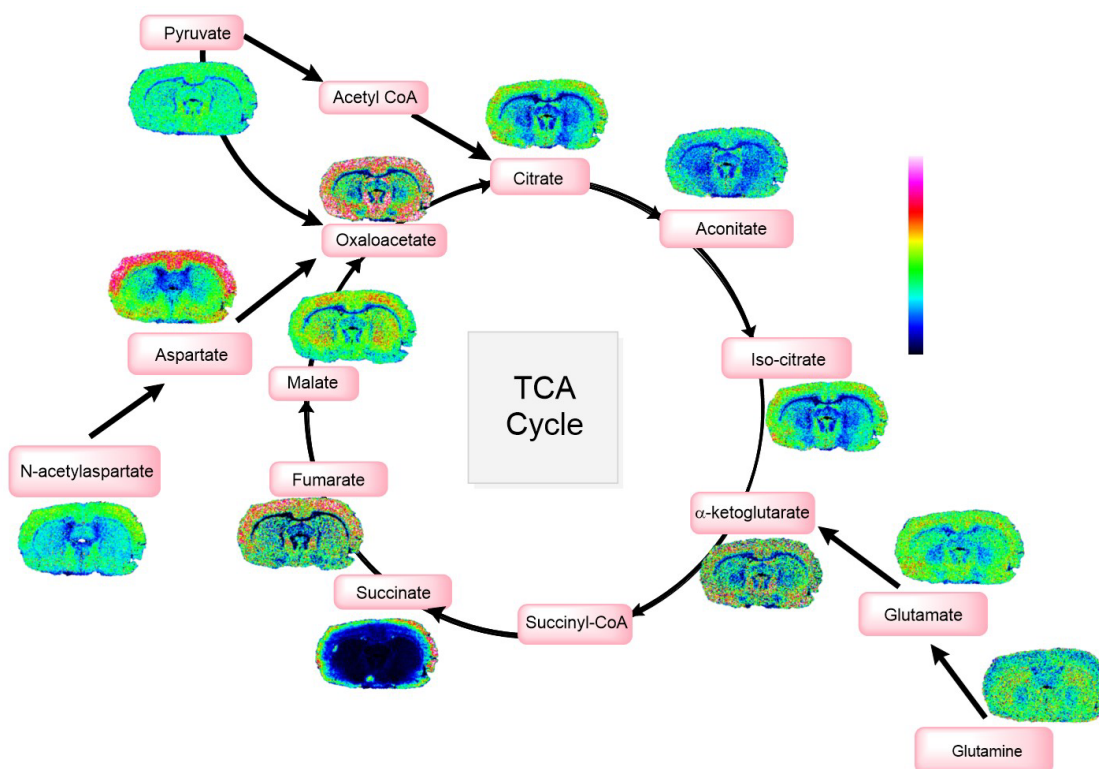

**Supporting Information Figure S9.** Representative ion images of identified metabolites within the TCA cycle and some associated metabolic pathways from rat brain tissue sections obtained using AMPP/HATU derivatization and MALDI-FTICR-MSI. Data are shown using a rainbow scale (ion intensity scale) for optimal visualization. Lateral resolution, 100  $\mu\text{m}$ .

**Supporting Information Table S1.** AMPP-derivatized aldehyde and carboxyl metabolite species were observed within brain tissue sections, including several neurotransmitters, amino acids and the associated metabolites, dipeptides, TCA cycle metabolites, glycolysis metabolites, reactive aldehydes, free fatty acids and fatty aldehydes. Free fatty acid (FFA) species, including essential fatty acids, were identified based on the fragment ions indicating that they had been derivatized with AMPP; the species were then annotated as the most likely fatty acid species based on abundance within brain tissues according to HMDB information ([www.hmdb.ca](http://www.hmdb.ca)) and previously published reports.<sup>1</sup> However, we were able to identify arachidonic acid (AA) and docosahexaenoic acid (DHA) based on specific double bond positional information obtained via on-tissue MS/MS. For fatty aldehydes, we obtained initial MS/MS data to validate that the detected compounds had been derivatized with AMPP and fatty aldehydes were identified based on the primary hits from HMDB ([www.hmdb.ca](http://www.hmdb.ca)). Neurotransmitter species, including DOPAL, DOPAC, HIAA, HIAL, HVA, and GABA, were determined based on mass accuracy, specific distributions within brain tissue sections, and alterations in 6-OHDA-lesioned coronal rat brain tissue sections and MPTP macaque brain tissue sections, as previously validated by our group<sup>2</sup> (see also SI Figure S6). We obtained MS/MS data for several metabolites directly from rat and/or macaque brain tissue sections (SI Figure S1-3). However, additional isobaric and isomeric compounds could also be fragmented within the same MS/MS analysis. <sup>1</sup>In the case that there were multiple primary hits for a molecule identified based on accurate mass, the compound with the highest likelihood of existing within brain tissue was selected.

| Metabolite                      | Formula   | M+AMPP Formula | M          | M-H        | M+H        | M+AMPP     | M+AMPP observed | ppm error |
|---------------------------------|-----------|----------------|------------|------------|------------|------------|-----------------|-----------|
| Citric Acid/Isocitric Acid      | C6H8O7    | C18H19N2O6     | 192.027003 | 191.019727 | 193.034279 | 359.123763 | 359.1238        | -0.10     |
| GABA                            | C4H9NO2   | C16H20N3O      | 103.063329 | 102.056053 | 104.070605 | 270.160089 | 270.1604        | -1.15     |
| FA(20:4)-Arachidionic Acid      | C20H32O2  | C32H43N2O      | 304.24023  | 303.232954 | 305.247506 | 471.33699  | 471.3368        | 0.40      |
| Hydroxyglutaric Acid*           | C5H8O5    | C17H19N2O4     | 148.037173 | 147.029897 | 149.044449 | 315.133933 | 315.1342        | -0.85     |
| Fumaric Acid*                   | C4H4O4    | C16H15N2O3     | 116.010959 | 115.003683 | 117.018235 | 283.107719 | 283.108         | -0.99     |
| Succinic Acid                   | C4H6O4    | C16H17N2O3     | 118.026609 | 117.019333 | 119.033885 | 285.123369 | 285.12371       | -1.20     |
| Malic Acid                      | C4H6O5    | C16H17N2O4     | 134.021523 | 133.014247 | 135.028799 | 301.118283 | 301.11852       | -0.79     |
| Oxaloacetic Acid*               | C4H4O5    | C16H15N2O4     | 132.005873 | 130.998597 | 133.013149 | 299.102633 | 299.1029        | -0.89     |
| $\alpha$ -ketoglutaric Acid*    | C5H6O5    | C17H17N2O4     | 146.021523 | 145.014247 | 147.028799 | 313.118283 | 313.1188        | -1.65     |
| Lactic Acid                     | C3H6O3    | C15H17N2O2     | 90.031694  | 89.024418  | 91.03897   | 257.128454 | 257.1288        | -1.35     |
| FA(22:6)-Docosahexanoic acid    | C22H32O2  | C34H43N2O      | 328.24023  | 327.232954 | 329.247506 | 495.33699  | 495.33651       | 0.97      |
| DOPAL                           | C8H8O3    | C20H19N2O2     | 152.047344 | 151.040068 | 153.05462  | 319.144104 | 319.14427       | -0.52     |
| Aspartic Acid                   | C4H7NO4   | C16H18N3O3     | 133.037508 | 132.030232 | 134.044784 | 300.134268 | 300.13445       | -0.61     |
| FA(18:1)-Oleic Acid             | C18H34O2  | C30H45N2O      | 282.25588  | 281.248604 | 283.263156 | 449.35264  | 449.35254       | 0.22      |
| FA(18:2)-Linoleic Acid*         | C18H32O2  | C30H43N2O      | 280.24023  | 279.232954 | 281.247506 | 447.33699  | 447.33676       | 0.51      |
| FA(18:3)-Linolenic Acid         | C18H30O2  | C30H41N2O      | 278.22458  | 277.217304 | 279.231856 | 445.32134  | 445.3212        | 0.31      |
| FA(16:0)-Palmitic Acid          | C16H32O2  | C28H43N2O      | 256.24023  | 255.232954 | 257.247506 | 423.33699  | 423.33687       | 0.28      |
| FA(16:1)-Palmitoleic Acid       | C16H30O2  | C28H41N2O      | 254.22458  | 253.217304 | 255.231856 | 421.32134  | 421.3212        | 0.33      |
| FA(18:0)-Stearic Acid           | C18H36O2  | C30H47N2O      | 284.27153  | 283.264254 | 285.278806 | 451.36829  | 451.3678        | 1.09      |
| FA(22:4)-Docosatetraenoic Acid  | C22H36O2  | C34H47N2O      | 332.27153  | 331.264254 | 333.278806 | 499.36829  | 499.36785       | 0.88      |
| FA(22:5)-Docosapentaenoic acid  | C22H34O2  | C34H45N2O      | 330.25588  | 329.248604 | 331.263156 | 497.35264  | 497.35222       | 0.84      |
| FA(20:1)-Eicosenoic Acid*       | C20H38O2  | C32H49N2O      | 310.28718  | 309.279904 | 311.294456 | 477.38394  | 477.38353       | 0.86      |
| FA(20:5)-Eicosapentaenoic Acid* | C20H30O2  | C32H41N2O      | 302.22458  | 301.217304 | 303.231856 | 469.32134  | 469.321         | 0.72      |
| Glutamate                       | C5H9NO4   | C17H20N3O3     | 147.053158 | 146.045882 | 148.060434 | 314.149918 | 314.15013       | -0.67     |
| Glutamine*                      | C5H10N2O3 | C17H21N4O2     | 146.069142 | 145.061866 | 147.076418 | 313.165902 | 313.1661        | -0.63     |
| HVA                             | C9H10O4   | C21H21N2O3     | 182.057909 | 181.050633 | 183.065185 | 349.154669 | 349.15484       | -0.49     |
| DOPAC                           | C8H8O4    | C20H19N2O3     | 168.042259 | 167.034983 | 169.049535 | 335.139019 | 335.1393        | -0.84     |
| Pyruvic Acid                    | C3H4O3    | C15H15N2O2     | 88.016044  | 87.008768  | 89.02332   | 255.112804 | 255.1131        | -1.16     |

|                                |            |            |            |            |            |            |           |       |
|--------------------------------|------------|------------|------------|------------|------------|------------|-----------|-------|
| 5-HIAA                         | C10H9NO3   | C22H20N3O2 | 191.058243 | 190.050967 | 192.065519 | 358.155003 | 358.15513 | -0.35 |
| N-Acetylaspartic Acid          | C6H9NO5    | C18H20N3O4 | 175.048072 | 174.040796 | 176.055348 | 342.144832 | 342.1451  | -0.78 |
| Aconitic Acid                  | C6H6O6     | C18H17N2O5 | 174.016438 | 173.009162 | 175.023714 | 341.113198 | 341.1134  | -0.59 |
| Acetic Acid                    | C2H4O2     | C14H15N2O  | 60.021129  | 59.013853  | 61.028405  | 227.117889 | 227.11832 | -1.90 |
| Glucose/Galactose              | C6H12O6    | C18H23N2O5 | 180.063388 | 179.056112 | 181.070664 | 347.160148 | 347.16037 | -0.64 |
| Pantothenic Acid               | C9H17NO5   | C21H28N3O4 | 219.110673 | 218.103397 | 220.117949 | 386.207433 | 386.20743 | 0.01  |
| 5-HIAL                         | C10H9NO2   | C22H20N3O  | 175.063329 | 174.056053 | 176.070605 | 342.160089 | 342.16051 | -1.23 |
| HNE*                           | C9H16O2    | C21H27N2O  | 156.11503  | 155.107754 | 157.122306 | 323.21179  | 323.212   | -0.65 |
| Malondialdehyde/Pyruvaldehyde* | C3H4O2     | C15H15N2O  | 72.021129  | 71.013853  | 73.028405  | 239.117889 | 239.1183  | -1.72 |
| Acrolein                       | C3H4O      | C15H15N2   | 56.026215  | 55.018939  | 57.033491  | 223.122975 | 223.1234  | -1.90 |
| Creatine*                      | C4H9N3O2   | C16H20N5O  | 131.069477 | 130.062201 | 132.076753 | 298.166237 | 298.16657 | -1.12 |
| Glycine*                       | C2H5NO2    | C14H16N3O  | 75.032028  | 74.024752  | 76.039304  | 242.128788 | 242.1292  | -1.70 |
| Gln-Gln*                       | C10H18N4O5 | C22H29N6O4 | 274.12772  | 273.120444 | 275.134996 | 441.22448  | 441.22414 | 0.77  |
| Gly-Phe/Phe-Gly*               | C11H14N2O3 | C23H25N4O2 | 222.100442 | 221.093166 | 223.107718 | 389.197202 | 389.1972  | 0.01  |
| NAAG                           | C11H16N2O8 | C23H27N4O7 | 304.090665 | 303.083389 | 305.097941 | 471.187425 | 471.18706 | 0.77  |
| beta-ctryl glutamate*          | C11H15NO10 | C23H26N3O9 | 321.069596 | 320.06232  | 322.076872 | 488.166356 | 488.16601 | 0.71  |
| Pentadecanal                   | C15H30O    | C27H41N2   | 226.229666 | 225.22239  | 227.236942 | 393.326426 | 393.3264  | 0.07  |
| Pentadecenal                   | C15H28O    | C27H39N2   | 224.214016 | 223.20674  | 225.221292 | 391.310776 | 391.31068 | 0.25  |
| Heptadecanal                   | C17H34O    | C29H45N2   | 254.260966 | 253.25369  | 255.268242 | 421.357726 | 421.3576  | 0.30  |
| Hexadecanal                    | C16H32O    | C28H43N2   | 240.245316 | 239.23804  | 241.252592 | 407.342076 | 407.3419  | 0.43  |
| Octadecanal                    | C18H36O    | C30H47N2   | 268.276616 | 267.26934  | 269.283892 | 435.373376 | 435.3732  | 0.40  |
| Tetradecanal                   | C14H28O    | C26H39N2   | 212.214016 | 211.20674  | 213.221292 | 379.310776 | 379.3107  | 0.20  |
| Alanine/Sarcosine*             | C3H7NO2    | C15H18N3O  | 89.047678  | 88.040402  | 90.054954  | 256.144438 | 256.1449  | -1.80 |
| Lysine*                        | C6H14N2O2  | C18H25N4O  | 146.105528 | 145.098252 | 147.112804 | 313.202288 | 313.2024  | -0.36 |
| Leucine/Isoleucine*            | C6H13NO2   | C18H24N3O  | 131.094629 | 130.087353 | 132.101905 | 298.191389 | 298.19169 | -1.01 |
| Glutamate-semialdehyde         | C5H9NO3    | C17H20N3O2 | 131.058243 | 130.050967 | 132.065519 | 298.155003 | 298.1553  | -1.00 |
| Hydroxybutyric Acid-GHB        | C4H8O3     | C16H19N2O2 | 104.047344 | 103.040068 | 105.05462  | 271.144104 | 271.1445  | -1.46 |
| Succinic Semialdehyde          | C4H6O3     | C16H17N2O2 | 102.031694 | 101.024418 | 103.03897  | 269.128454 | 269.1288  | -1.29 |

## REFERENCES

1. Wu, Q.; Comi, T. J.; Li, B.; Rubakhin, S. S.; Sweedler, J. V., On-tissue derivatization via electrospray deposition for matrix-assisted laser desorption/ionization mass spectrometry imaging of endogenous fatty acids in rat brain tissues. *Anal. Chem.* **2016**, *88* (11), 5988-5995.
2. Shariatgorji, M.; Nilsson, A.; Fridjonsdottir, E.; Vallianatou, T.; Källback, P.; Katan, L.; Sävmarker, J.; Mantas, I.; Zhang, X.; Bezdard, E., Comprehensive mapping of neurotransmitter networks by MALDI-MS imaging. *Nat. Methods* **2019**, *16* (10), 1021-1028.
